# Supplementary material for: Microorganisms Associated with the Marine Sponge Scopalina hapalia: A Reservoir of Bioactive Molecules to Slow Down the Aging Process
Source: PubMed Central journal article supplement (PMC7570120; doi:10.3390/microorganisms8091262), 2020-08-20
Supplement: microorganisms-08-01262-s001.pdf [file microorganisms-08-01262-s001.pdf]

# Supporting Information

## Microorganisms Associated with the Marine Sponge *Scopalina hapalia*: a Reservoir of Bioactive Molecules to Slow Down the Aging Process

Charifat Said Hassane <sup>1</sup>, Mireille Fouillaud <sup>1</sup>, Géraldine Le Goff <sup>2</sup>, Aimilia D. Sklirou <sup>3</sup>, Jean Bernard Boyer <sup>1</sup>, Ioannis P. Trougakos <sup>3</sup>, Moran Jerabek <sup>4</sup>, Jérôme Bignon <sup>2</sup>, Nicole J.de Voogd <sup>5,6</sup>, Jamal Ouazzani <sup>2</sup>, Anne Gauvin-Bialecki <sup>1,\*</sup> and Laurent Dufossé <sup>1,\*</sup>

<sup>1</sup> Laboratoire de Chimie et Biotechnologie des Produits Naturels, Faculté des Sciences et Technologies, Université de La Réunion, 15 Avenue René Cassin, CS 92003, 97744 Saint-Denis CEDEX 9, La Réunion, France; charifat.said-hassane@univ-reunion.fr (C.S.H.); mireille.fouillaud@univ-reunion.fr (M.F.); jean-bernard.boyer@univ-reunion.fr (J.B.B.); anne.bialecki@univ-reunion.fr (A.G.-B.), laurent.dufosse@univ-reunion.fr (L.D.)

<sup>2</sup> Institut de Chimie des Substances Naturelles, CNRS UPR 2301, Université Paris-Saclay, 1, av. de la Terrasse, 91198 Gif-sur-Yvette, France; geraldine.legoff@cnrs.fr (G.L.G.); jerome.bignon@cnrs.fr (J.B.); Jamal.Ouazzani@cnrs.fr (J.O.)

<sup>3</sup> Department of Cell Biology and Biophysics, Faculty of Biology, National and Kapodistrian University of Athens, 15784 Athens, Greece; asklirou@biol.uoa.gr (A.D.S.); itrougakos@biol.uoa.gr (I.P.T.)

<sup>4</sup> Crelux GmbH, Am Klopferspitz 19a, 82152 Martinsried, Germany; Moran\_Jerabek@wuxiapptec.com

<sup>5</sup> Naturalis Biodiversity Center, Darwinweg 2, 2333 CR Leiden, The Netherlands; nicole.devoogd@naturalis.nl

<sup>6</sup> Institute of Environmental Sciences, Leiden University, Einsteinweg 2, 2333 CC Leiden, The Netherlands

\* Correspondence: anne.bialecki@univ-reunion.fr (A.G.-B.) and laurent.dufosse@univ-reunion.fr (L.D.)

**Figure S1.** Rarefaction curves of observed OTUs for each targeted genomic DNA region. 2

**Figure S2.** Rarefaction curves of Chao1 Index for each targeted genomic DNA region. .... 2

**Figure S3.** Rarefaction curves of Shannon Index for each targeted genomic DNA region. . 3

**Figure S4.** Phylum distribution in *Scopalina hapalia* respective with V1-V3, V3-V4 and V4-V5 data sets. The bars represent the relative abundance of 16S rRNA sequences that were assigned to a given phylum in relation to the total number of sequences in each data set. ... 4

**Table S1.** 16S rRNA taxonomic affiliation of 10 of the *Scopalina hapalia* associated actinomycetes. .... 5

**Table S2.** 16S rRNA taxonomic affiliation of 17 Bacillales (order) strains isolated from *Scopalina hapalia*. .... 5

**Table S3.** Taxonomic affiliation of the 3 fungal isolates from *Scopalina hapalia* after sequencing fragments containing ITS region as well as partial beta-tubulin and calmodulin genes. .... 5

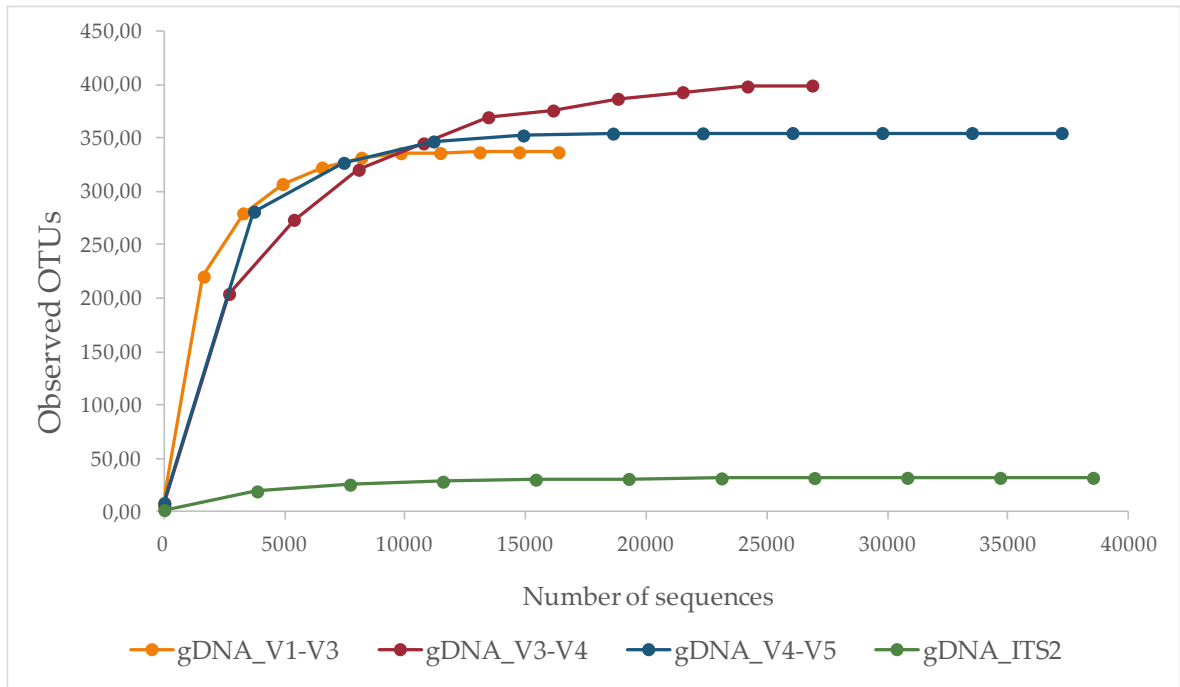

**Figure S1.** Rarefaction curves of observed Operational Taxonomic Units (OTUs) for each targeted genomic DNA region.

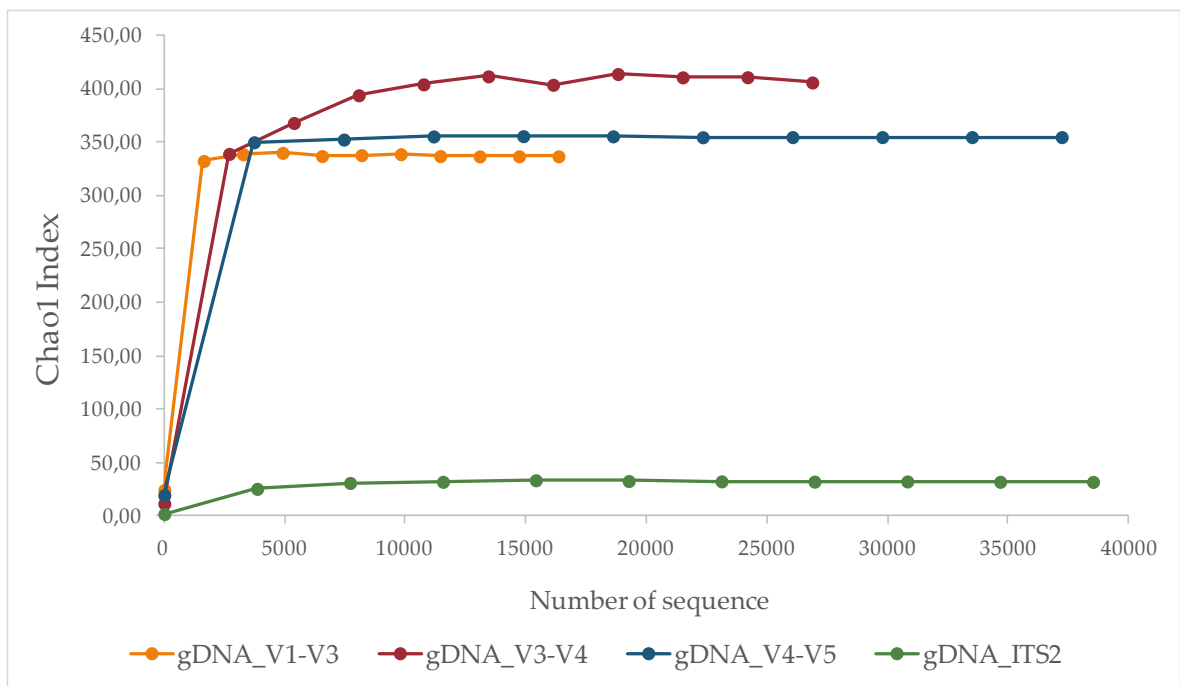

**Figure S2.** Rarefaction curves of Chao1 Index for each targeted genomic DNA region.

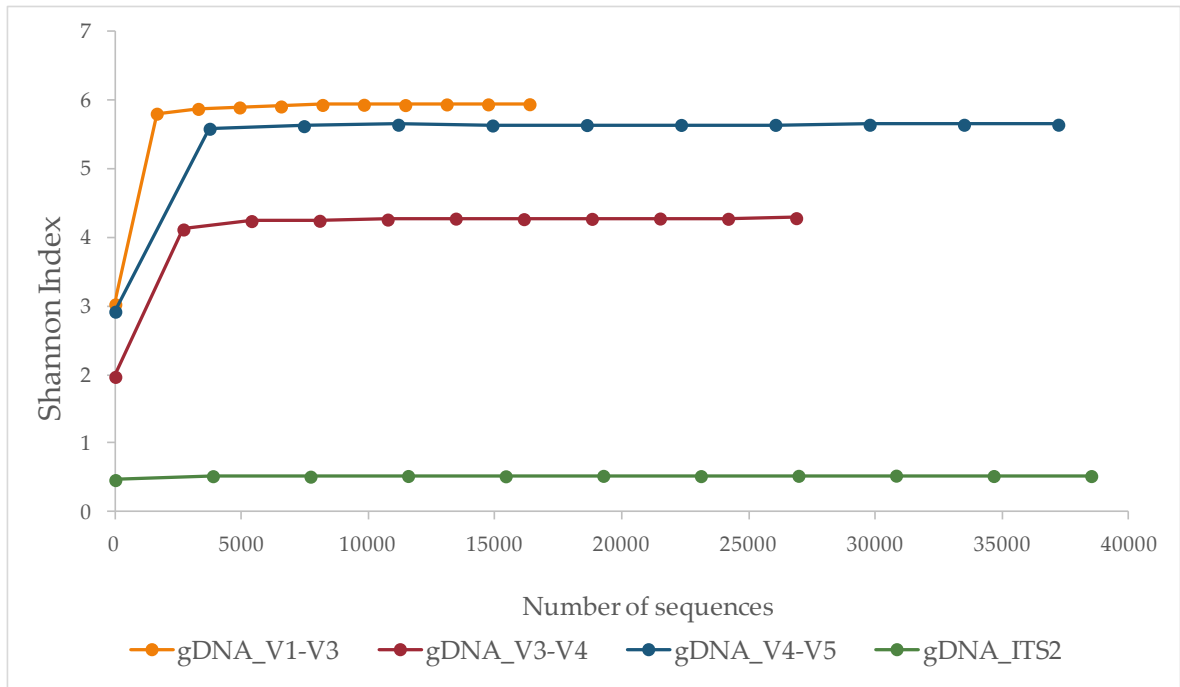

**Figure S3.** Rarefaction curves of Shannon Index for each targeted genomic DNA region.

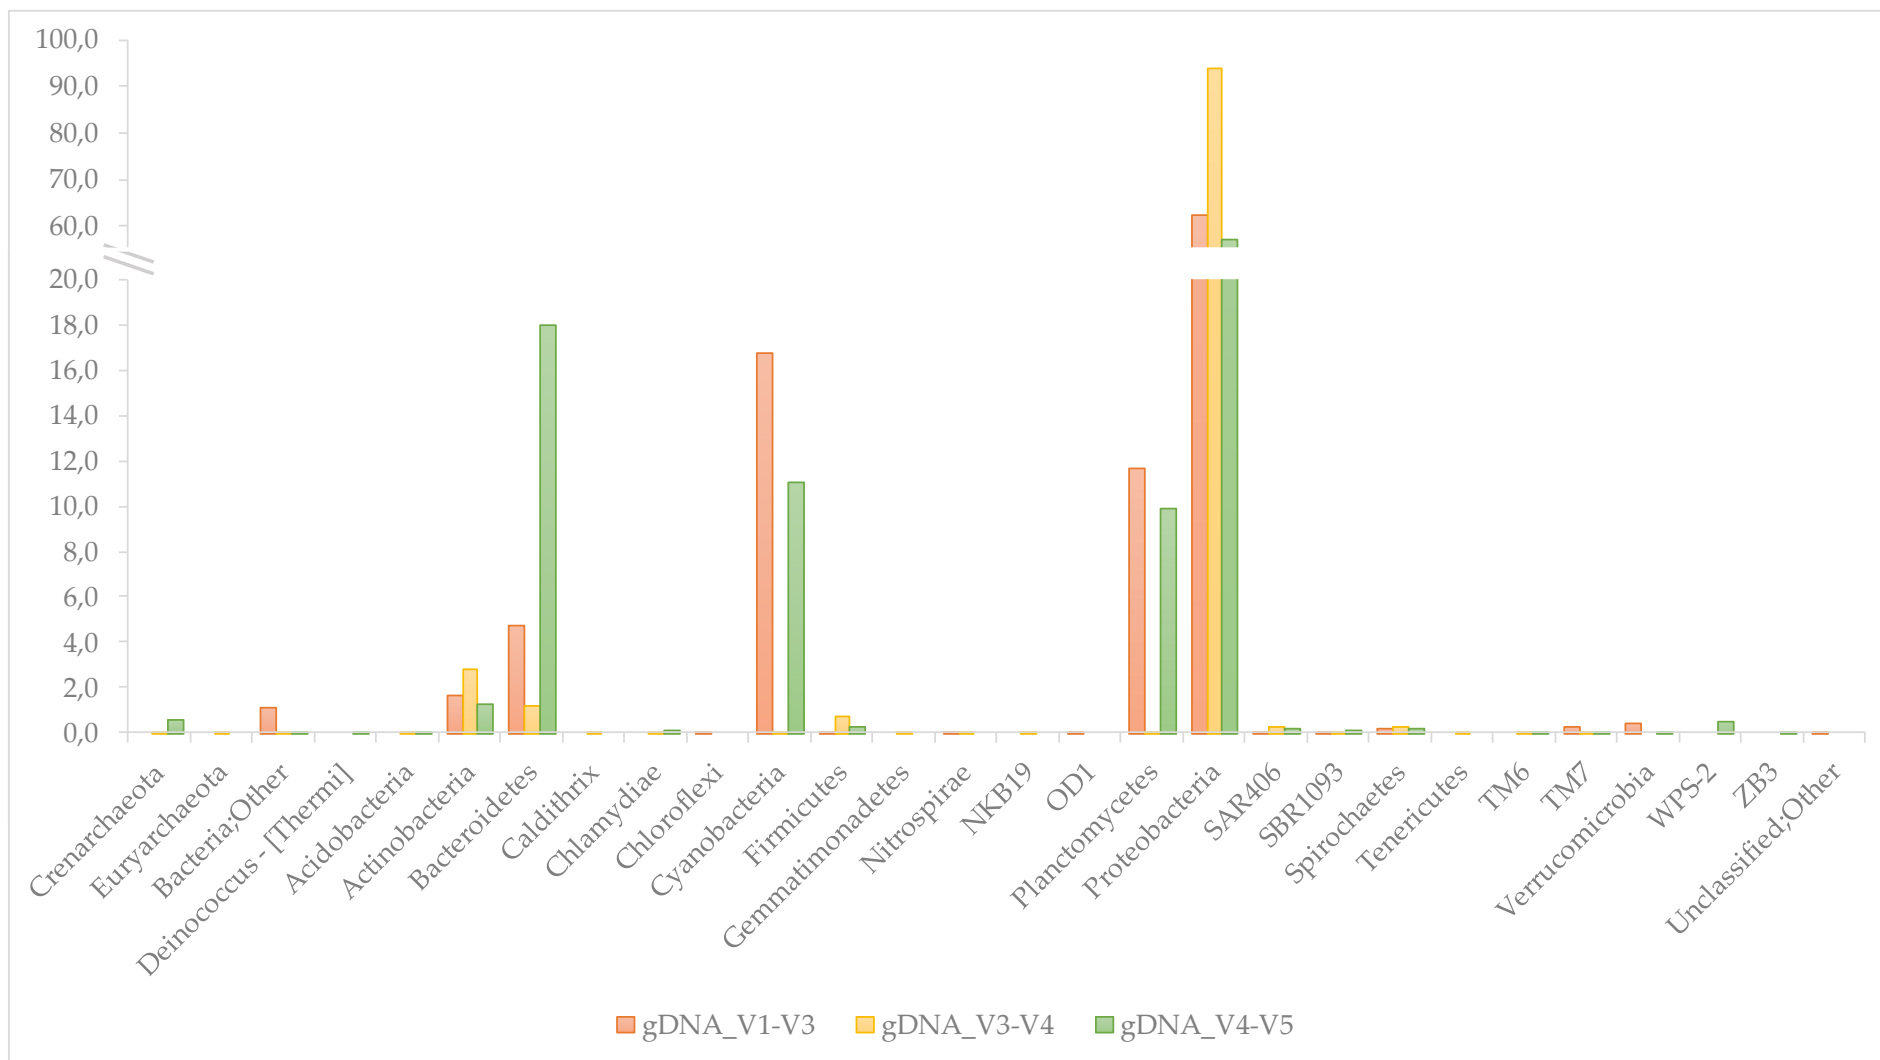

**Figure S4.** Phylum distribution in *Scopalina hapalia* respective with V1-V3, V3-V4 and V4-V5 data sets. The bars represent the relative abundance of 16S rRNA sequences that were assigned to a given phylum in relation to the total number of sequences in each data set.

**Table S1.** 16S rRNA taxonomic affiliation of 10 of the *Scopalina hapalia* associated actinomycetes.

| Isolate | Isolation Medium | Class             | Closest relative in EzBioCloud (Access Number) | Identity (%) <sup>a</sup> |
|---------|------------------|-------------------|------------------------------------------------|---------------------------|
| SH-36   | R2A              | Micromonosporales | <i>Micromonospora chokoriensis</i> (LT607409)  | 100.0                     |
| SH-45   | SCAM             | Micromonosporales | <i>Salinispora arenicola</i> (AY040619)        | 100.0                     |
| SH-54   | MBA              | Micromonosporales | <i>Salinispora arenicola</i> (AY040619)        | 100.0                     |
| SH-57   | A1BFe+c          | Micromonosporales | <i>Micromonospora echinospora</i> (LT607413)   | 99.6                      |
| SH-78   | MBA              | Micromonosporales | <i>Salinispora arenicola</i> (AY040619)        | 100.0                     |
| SH-82   | MBA              | Micromonosporales | <i>Micromonospora fluostatini</i> (LC033898)   | 99.2                      |
| SH-89   | SCAM             | Micromonosporales | <i>Micromonospora citrea</i> (FMHZ01000002)    | 99.5                      |
| SH-95   | MBA              | Micromonosporales | <i>Micromonospora tulbaghia</i> (jgi.1058868)  | 99.3                      |
| SH-108  | R2A              | Micromonosporales | <i>Micromonospora endophytica</i> (EU560726)   | 99.5                      |
| SH-115  | SCAM             | Corynebacteriales | <i>Rhodococcus nanhaiensis</i> (JN582175)      | 99.9                      |

<sup>a</sup>: indicates the percent sequence similarity shared between each isolate and its nearest type strain.

**Table S2.** 16S rRNA taxonomic affiliation of 17 Bacillales (order) strains isolated from *Scopalina hapalia*.

| Isolate            | Isolation Medium | Family                 | Closest relative in EzBioCloud (Access Number) | Identity (%) <sup>a</sup> |
|--------------------|------------------|------------------------|------------------------------------------------|---------------------------|
| SH-02a             | A1BFe+c          | Bacillaceae            | <i>Bacillus paralicheniformis</i> (KY694465)   | 100.0                     |
| SH-02b             | A1BFe+c          | Bacillaceae            | <i>Bacillus paralicheniformis</i> (KY694465)   | 100.0                     |
| SH-02c             | A1BFe+c          | Bacillaceae            | <i>Bacillus paralicheniformis</i> (KY694465)   | 100.0                     |
| SH-04              | A1BFe+c          | Bacillaceae            | <i>Bacillus licheniformis</i> (AE017333)       | 99.9                      |
| SH-10              | LB               | Bacillaceae            | <i>Bacillus paralicheniformis</i> (KY694465)   | 99.9                      |
| SH-22              | R2A              | Bacillaceae            | <i>Bacillus paralicheniformis</i> (KY694465)   | 100.0                     |
| SH-42              | MYA2             | Bacillaceae            | <i>Bacillus paralicheniformis</i> (KY694465)   | 99.6                      |
| SH-46              | SCAM             | Bacillaceae            | <i>Bacillus licheniformis</i> (AE017333)       | 99.9                      |
| SH-60              | LB               | Bacillaceae            | <i>Bacillus paralicheniformis</i> (KY694465)   | 100.0                     |
| SH-68a             | MYA2             | Bacillaceae            | <i>Bacillus licheniformis</i> (AE017333)       | 99.8                      |
| SH-68b             | MYA2             | Bacillaceae            | <i>Bacillus licheniformis</i> (AE017333)       | 99.8                      |
| SH-99              | MBA              | Bacillaceae            | <i>Bacillus licheniformis</i> (AE017333)       | 99.8                      |
| SH-100             | MBA              | Bacillaceae            | <i>Bacillus licheniformis</i> (AE017333)       | 99.8                      |
| SH-116a            | MBA              | Bacillaceae            | <i>Bacillus licheniformis</i> (AE017333)       | 99.8                      |
| SH-137             | MBA              | Bacillaceae            | <i>Bacillus berkeleyi</i> (JN187498)           | 98.8                      |
| SH-32              | MBA              | Thermoactinomycetaceae | DQ448769_s                                     | 100.0                     |
| SH-39 <sup>b</sup> | MBA              | Thermoactinomycetaceae | DQ448769_s                                     | 97.1                      |

<sup>a</sup>: indicates the percent sequence similarity shared between each isolate and its nearest type strain, <sup>b</sup>: represents a potential new phylotype.

**Table S3.** Taxonomic affiliation of the three fungal isolates from *Scopalina hapalia* after sequencing fragments containing the Internal Transcribed Spacer (ITS) region, as well as partial beta-tubulin and calmodulin genes.

| Isolate | Isolation Medium | Order             | Closest Relative in the in-House Sequence Database of Westerdijk Fungal Biodiversity Institute |
|---------|------------------|-------------------|------------------------------------------------------------------------------------------------|
| SH-53   | A1BFe+c          | Trichosphaeriales | <i>Nigrospora aurantiaca</i> Mei Wang & L. Cai                                                 |
| SH-122  | A1BFe+c          | Eurotiales        | <i>Aspergillus sydowii</i> (Bainier & Sartory) Thom & Church                                   |
| SH-123  | LB               | Sordariales       | <i>Chaetomium globosum</i> Kunze                                                               |
